# Supplementary material
Source: PubMed Central journal article supplement (PMC5783296)
Supplement: NIHMS933538-supplement-supplement_1.pdf [file NIHMS933538-supplement-supplement_1.pdf]

## **Alteration of RNA splicing by small molecule inhibitors of the interaction between NHP2L1 and U4**

Barthelemy Diouf<sup>1,2\*</sup>, Wenwei Lin<sup>3</sup>, Asli Goktug<sup>3</sup>, Christy R. R. Grace<sup>4</sup>, Michael Brett Waddell<sup>5</sup>, Ju Bao<sup>1,2</sup>, Youming Shao<sup>6</sup>, Richard J. Heath<sup>6</sup>, Jie J. Zheng<sup>7</sup>, Anang A. Shelat<sup>3</sup>, Mary V. Relling<sup>1,2</sup>, Taosheng Chen<sup>3</sup> and William E. Evans<sup>1,2\*</sup>

<sup>1</sup>*Hematological Malignancies Program, St. Jude Children's Research Hospital, Memphis, TN, 38105, USA ;*

<sup>2</sup>*Department of Pharmaceutical Sciences, St. Jude Children's Research Hospital, Memphis, TN, 38105,*

*USA; <sup>3</sup>Department of Chemical Biology and Therapeutics, St. Jude Children's Research Hospital, Memphis,*

*TN, 38105, USA; <sup>4</sup>Department of Structural Biology, St. Jude Children's Research Hospital, Memphis, TN,*

*38105, USA; <sup>5</sup>Molecular Interaction Analysis Shared Resource, St. Jude Children's Research Hospital,*

*Memphis, TN, 38105, USA; <sup>6</sup>Protein Production Facility, St. Jude Children's Research Hospital, Memphis,*

*TN, 38105, USA; <sup>7</sup>Stein Eye Institute and Department of Ophthalmology, David Geffen School Of*

*Medicine, UCLA, Los Angeles, CA, 90095, USA.*

\*Correspondence: Dr. William E. Evans, [william.evans@stjude.org](mailto:william.evans@stjude.org), St. Jude Children's Research Hospital, 262 Danny Thomas Place, Memphis, TN 38105, USA; Phone: (901) 495-3301; Fax: (901) 525-6869 or Dr. Barthelemy Diouf, [barthelemy.diouf@stjude.org](mailto:barthelemy.diouf@stjude.org), St. Jude Children's Research Hospital, 262 Danny Thomas Place, Memphis, TN 38105, USA; Phone: (901) 595-2158

### **Supplementary Material.**

**-Tables S1, 2, 3**

**-Figures S1-6**

Table S1. 53 unique compounds with % Inhibition  $\geq$  40% were selected from the primary screening (at 15  $\mu$ M) for dose response analysis to determine the IC<sub>50</sub> values where applicable.

| No. | SJ Number      | Compound name | Structure                                                                                                                                                                                                                                                                                                                                                                                                                                                                | %Inhibition (at 15 $\mu$ M) | IC <sub>50</sub> |
|-----|----------------|---------------|--------------------------------------------------------------------------------------------------------------------------------------------------------------------------------------------------------------------------------------------------------------------------------------------------------------------------------------------------------------------------------------------------------------------------------------------------------------------------|-----------------------------|------------------|
| 1   | SJ000287149-13 | Topotecan     | 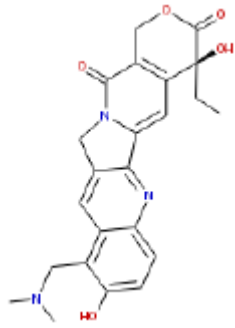 <p>The structure of Topotecan is a complex polycyclic molecule. It features a central pyridine ring fused to a benzene ring, which is further fused to a five-membered imidazole ring. A side chain containing a lactone ring and a hydroxyl group is attached to the pyridine ring. Another side chain with a methyl group and a hydroxyl group is attached to the benzene ring.</p> | 81.6%                       | 2.1 $\mu$ M      |
| 2   | SJ000574283-2  | SB-431542     |  <p>The structure of SB-431542 is a pyrazole derivative. It has a pyrazole ring substituted with a benzofuran group, a pyridine ring, and a benzamide group.</p>                                                                                                                                                                                                                      | 70.9%                       | 9.2 $\mu$ M      |
| 3   | SJ000285745-10 | Dipyridamole  |  <p>The structure of Dipyridamole is a pyrimidopyrimidine derivative. It consists of a central pyrimidopyrimidine ring system with two piperidine rings and two hydroxyethyl groups attached to the nitrogen atoms.</p>                                                                                                                                                              | 69.8%                       | ND*              |

|   |               |            |                                                                                      |       |              |
|---|---------------|------------|--------------------------------------------------------------------------------------|-------|--------------|
| 4 | SJ000773191-2 | D 4476     | 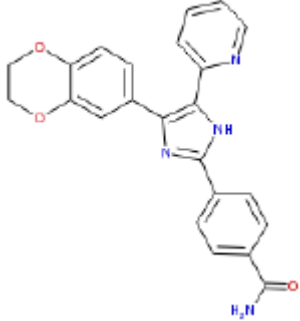   | 69.7% | 34.7 $\mu$ M |
| 5 | SJ000285455-2 | Harmaline  |    | 67.5% | 33.7 $\mu$ M |
| 6 | SJ000574286-4 | Dovitinib  |   | 67.2% | ND           |
| 7 | SJ000561072-6 | Tazarotene |  | 65.5% | 21.1 $\mu$ M |

|    |               |            |                                                                                      |       |              |
|----|---------------|------------|--------------------------------------------------------------------------------------|-------|--------------|
| 8  | SJ000285323-3 | Merbromin  | 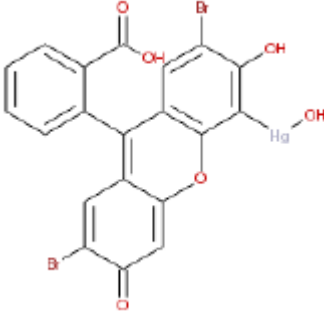   | 64.9% | 29.6 $\mu$ M |
| 9  | SJ000286937-3 | Fisetin    |    | 64.2% | 51.4 $\mu$ M |
| 10 | SJ000855356-1 | CHIR-99021 |   | 62.7% | ND           |
| 11 | SJ000855455-1 | XL888      |  | 62.6% | 30.2 $\mu$ M |
| 12 | SJ000791567-6 | Crenolanib |  | 62.5% | 9.3 $\mu$ M  |

|    |               |                      |                                                                                      |       |              |
|----|---------------|----------------------|--------------------------------------------------------------------------------------|-------|--------------|
| 13 | SJ000285345-2 | Harmalol             | 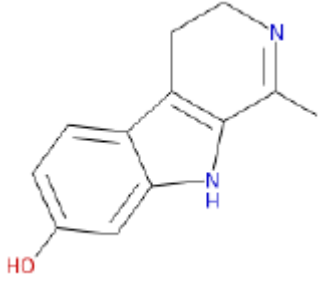   | 61.7% | 49.9 $\mu$ M |
| 14 | SJ000855162-1 | CP-673451            |    | 61.4% | ND           |
| 15 | SJ000784257-6 | Rucaparib            |   | 57.8% | ND           |
| 16 | SJ000286080-2 | Olmesartan medoxomil |  | 55.7% | ND           |
| 17 | SJ000285441-1 | Calcein              |  | 55.3% | ND           |

|    |               |            |                                                                                      |       |              |
|----|---------------|------------|--------------------------------------------------------------------------------------|-------|--------------|
| 18 | SJ000833872-2 | UNC1999    | 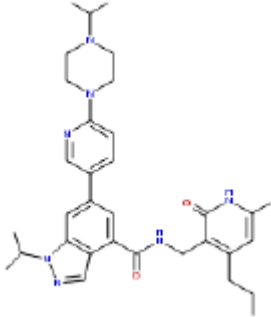   | 55.2% | 53.5 $\mu$ M |
| 19 | SJ000852778-2 | GSK1070916 |    | 55.0% | ND           |
| 20 | SJ000312173-2 | Aloisine   |   | 54.7% | 3.4 $\mu$ M  |
| 21 | SJ000311679-7 | SN-38      |  | 53.5% | 1.6 $\mu$ M  |

|    |               |                 |                                                                                      |       |              |
|----|---------------|-----------------|--------------------------------------------------------------------------------------|-------|--------------|
| 22 | SJ000312172-5 | Aloisine A      | 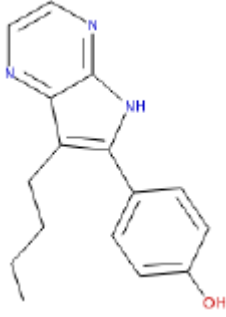   | 52.8% | ND           |
| 23 | SJ000288308-1 | RO 90-7501      |     | 52.8% | 16.5 $\mu$ M |
| 24 | SJ000785921-2 | A 922500        |   | 52.6% | 31.3 $\mu$ M |
| 25 | SJ000288306-1 | AC-93253 iodide |  | 52.5% | 11.4 $\mu$ M |

|    |                |                   |                                                                                      |       |         |
|----|----------------|-------------------|--------------------------------------------------------------------------------------|-------|---------|
| 26 | SJ000285538-5  | Piperacillin      | 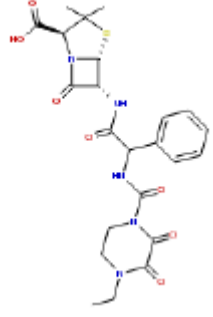   | 51.4% | ND      |
| 27 | SJ000285656-8  | Methyl-Ergonovine |    | 50.6% | ND      |
| 28 | SJ000285911-12 | Levofloxacin      |    | 50.6% | 45.4 μM |
| 29 | SJ000286160-5  | Pyrvinium pamoate |  | 50.5% | ND      |
| 30 | SJ000287706-2  | ST-148            |  | 50.4% | 23.3 μM |



|    |               |                             |                                                                                      |       |              |
|----|---------------|-----------------------------|--------------------------------------------------------------------------------------|-------|--------------|
| 31 | SJ000560618-6 | Linifanib                   | 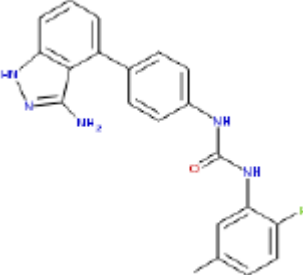   | 50.3% | 24.1 $\mu$ M |
| 32 | SJ000286965-1 | (S)-10-Hydroxy-camptothecin |     | 50.0% | 2.4 $\mu$ M  |
| 33 | SJ000562694-2 | Moxifloxacin                |   | 49.5% | ND           |
| 34 | SJ000286099-2 | Benzanthrone                |  | 49.4% | ND           |

|    |                |                       |                                                                                      |       |              |
|----|----------------|-----------------------|--------------------------------------------------------------------------------------|-------|--------------|
| 35 | SJ000285553-3  | Cefditorin pivoxil    | 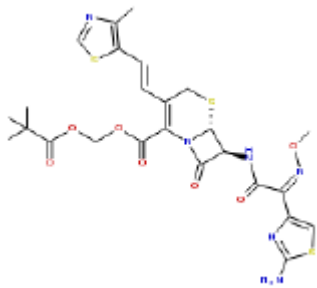   | 47.0% | ND           |
| 36 | SJ000791566-7  | Ponatinib             |    | 46.7% | ND           |
| 37 | SJ000852750-2  | Tie2 kinase inhibitor |   | 46.5% | 56.4 $\mu$ M |
| 38 | SJ000285536-14 | Pilocarpine           |  | 45.7% | ND           |
| 39 | SJ000286967-1  | 3,7-Dihydroxyflavone  |  | 45.6% | ND           |

|    |                |                         |                                                                                      |       |         |
|----|----------------|-------------------------|--------------------------------------------------------------------------------------|-------|---------|
| 40 | SJ000287594-2  | Aurintricarboxylic acid | 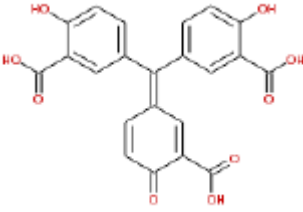   | 45.1% | ND      |
| 41 | SJ000288237-5  | Taxifolin               |    | 45.0% | ND      |
| 42 | SJ000780471-10 | Volasertib              |   | 44.7% | ND      |
| 43 | SJ000285342-1  | Scopoletin              |  | 44.5% | 66.9 μM |
| 44 | SJ000286086-4  | Riboflavine             |  | 44.4% | 59.8 μM |

|    |                |                          |                                                                                      |       |              |
|----|----------------|--------------------------|--------------------------------------------------------------------------------------|-------|--------------|
| 45 | SJ000287024-1  | 7-Oxocholesteryl acetate | 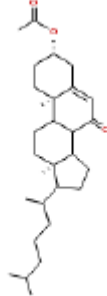    | 44.1% | ND           |
| 46 | SJ000312367-5  | Darunavir                |    | 43.9% | ND           |
| 47 | SJ000287434-5  | Hymecromone              |   | 43.9% | ND           |
| 48 | SJ000855214-1  | KW-2449                  |  | 42.9% | 33.9 $\mu$ M |
| 49 | SJ000312345-11 | Irinotecan               |   | 42.6% | 50.1 $\mu$ M |

|    |               |            |                                                                                      |       |              |
|----|---------------|------------|--------------------------------------------------------------------------------------|-------|--------------|
| 50 | SJ000571306-5 | AZD8055    | 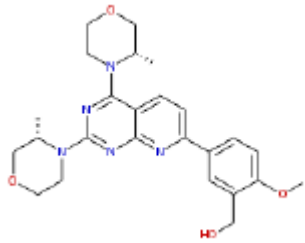   | 42.2% | 40.6 $\mu$ M |
| 51 | SJ000546519-2 | AGN-192837 |    | 41.4% | 2.3 $\mu$ M  |
| 52 | SJ000285590-4 | Aesculin   |   | 41.3% | ND           |
| 53 | SJ000312300-3 | Seroquel   |  | 40.1% | ND           |

SJ corresponds to St Jude Children's Research Hospital

\*ND: IC<sub>50</sub> value is not determined.

Table S2. IC<sub>50</sub> from Dose Response curve of Topotecan and camptothecin derivatives

| Drug name                                              | IC <sub>50</sub> <sup>1</sup> | IC <sub>50</sub> <sup>2</sup> |
|--------------------------------------------------------|-------------------------------|-------------------------------|
| Topotecan                                              | 2.1 ± 0.3 μM                  | 3.1 ± 0.2 μM                  |
| (S)-10-HO-camptothecin                                 | 2.4 ± 0.2 μM                  | 2.4 ± 0.3 μM                  |
| SN-38                                                  | 1.6 ± 0.1 μM                  | 2.1 ± 0.2 μM                  |
| Irinotecan                                             | 50.1 ± 2.8 μM                 | ND <sup>5</sup>               |
| (S)-camptothecin <sup>3</sup>                          | NT <sup>4</sup>               | ND                            |
| 9-NH <sub>2</sub> -(S)-camptothecin <sup>3</sup>       | NT                            | 80.5 ± 3.6 μM                 |
| 9-NO <sub>2</sub> -10-HO-(S)-camptothecin <sup>3</sup> | NT                            | ND                            |
| N-Desmethyl topotecan <sup>3</sup>                     | NT                            | 9.9 ± 0.8 μM                  |
| 7,11-diethyl-10-HO-(S)-camptothecin <sup>3</sup>       | NT                            | 2.0 ± 0.2 μM                  |

<sup>1</sup>The screening IC<sub>50</sub> values (using RISE, an in house data analysis software) were reported.

<sup>2</sup>The IC<sub>50</sub> values confirmed with re-purchased powders.

<sup>3</sup>Additional topotecan analogs were obtained for analog activity exploration. These analogs were not presented in the screening library.

<sup>4</sup>NT: IC<sub>50</sub> value was not tested.

<sup>5</sup>ND: not determined

Table S3. Binding of topotecan to U4 by surface plasma resonance.

| <b>Interaction</b> | <b><math>K_D</math> (<math>\mu\text{M}</math>)</b> | <b>Rmax (RU)</b> |
|--------------------|----------------------------------------------------|------------------|
| Topotecan + U4     | 91 ( $\pm$ 7)                                      | 27 ( $\pm$ 1)    |
| Topotecan + NHP2L1 | X                                                  | X                |

X = minimal binding observed

A

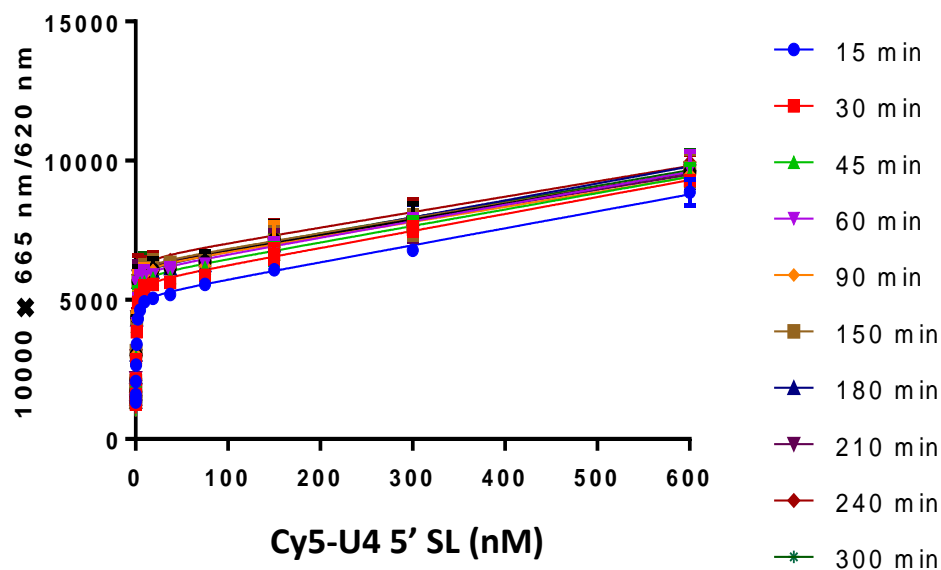

B

|         | K <sub>d</sub> |
|---------|----------------|
| 15 min  | 0.8355         |
| 30 min  | 0.7290         |
| 45 min  | 0.6805         |
| 60 min  | 0.7133         |
| 90 min  | 0.6620         |
| 120 min | 0.6853         |
| 150 min | 0.6874         |
| 180 min | 0.6447         |
| 210 min | 0.6511         |
| 240 min | 0.7200         |
| 300 min | 0.6814         |

**Figure S1.** TR-FRET signal stability. Increasing concentrations of Cy5-U4 5' SL were incubated with 2nM Terbium-anti-His and 2nM His-NHP2I1. (A) The TR-FRET signals are depicted as a function of the concentration of Cy5-U4 5' SL after 15min to 300 min incubation times. (B)  $K_d$  (nM) of the interaction His-NHP2I1 and Cy5-U4 5' SL at the different incubation times.



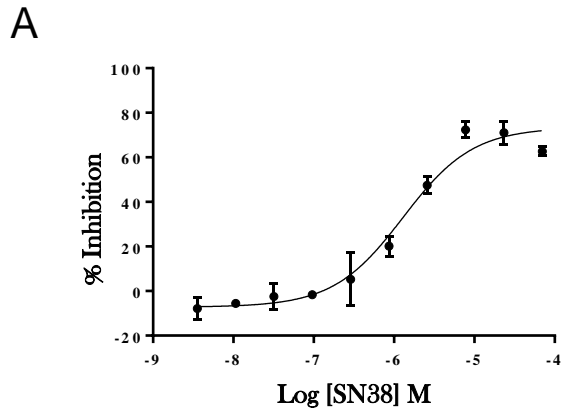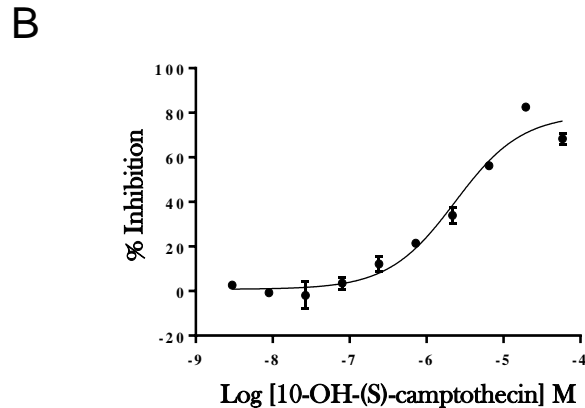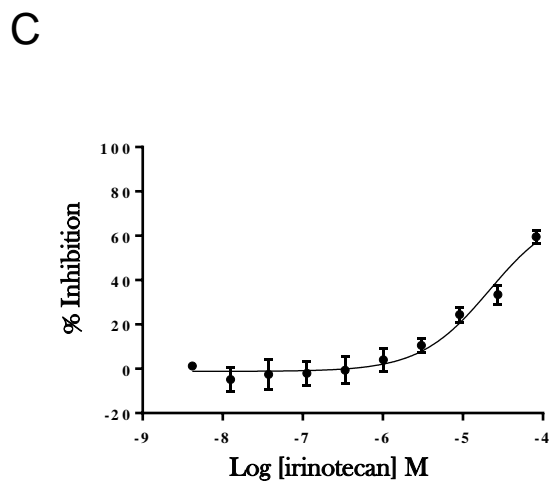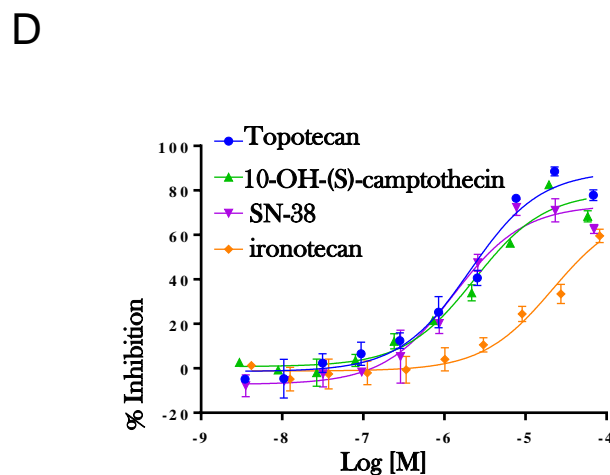

**Figure S2.** Dose response curve of Camptothecin derivatives in the library. Increasing concentration of SN-38 (A), 10-OH-camptothecin (B), or irinotecan (C) were incubated for 45min with 2nM Tb-anti-His, 2nM His-NHP2L1, 2nM Cy5-U4 5' SL. The TR-FRET signals were determined and converted into percentage of inhibition by reference to controls. Sigmoidal curve was fitted to the resulting data using GraphPad Prism 6.07. (D) Dose response curves of the four compounds relative to % inhibition of NHP2L1-U4 binding.  $IC_{50}$  values were determined from log[concentration]-percent inhibition curves constructed for each small molecule.

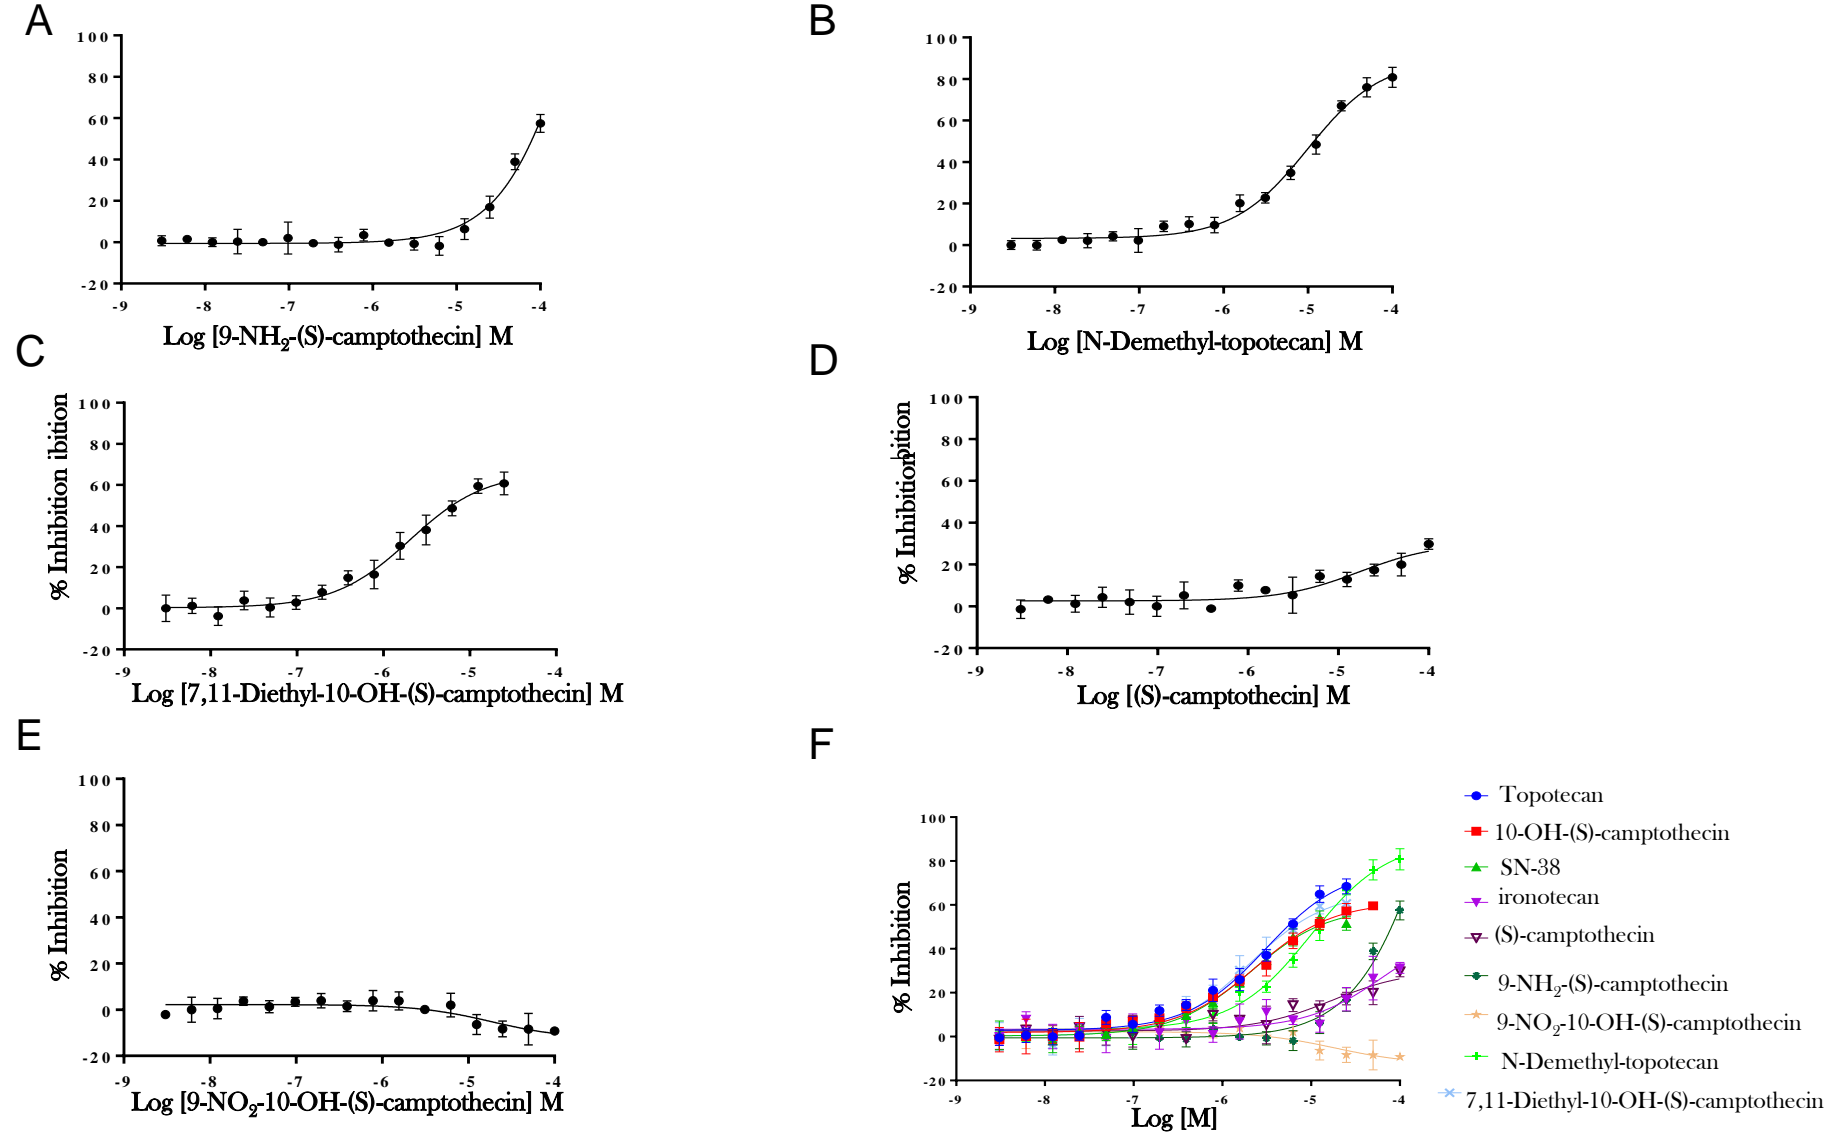

**Figure S3.** Dose response curves of additional camptothecin derivatives. Increasing concentration of 9-NH<sub>2</sub>-(S)-camptothecin (A), N-Demethyl-topotecan (B), 7,11-Diethyl-10-OH-(S)-camptothecin (C), (S)-camptothecin (D), 9-NO<sub>2</sub>-10-OH-(S)-camptothecin (E) were incubated for 45min with 2nM Tb-anti-His, 2nM His-NHP2L1, 2nM Cy5-U4 5' SL. The TR-FRET signals were determined and converted into percentage inhibition by reference to controls. Sigmoidal curve was fitted to the resulting data using GraphPad Prism 6.07. (F) Dose response curves of the nine compounds.

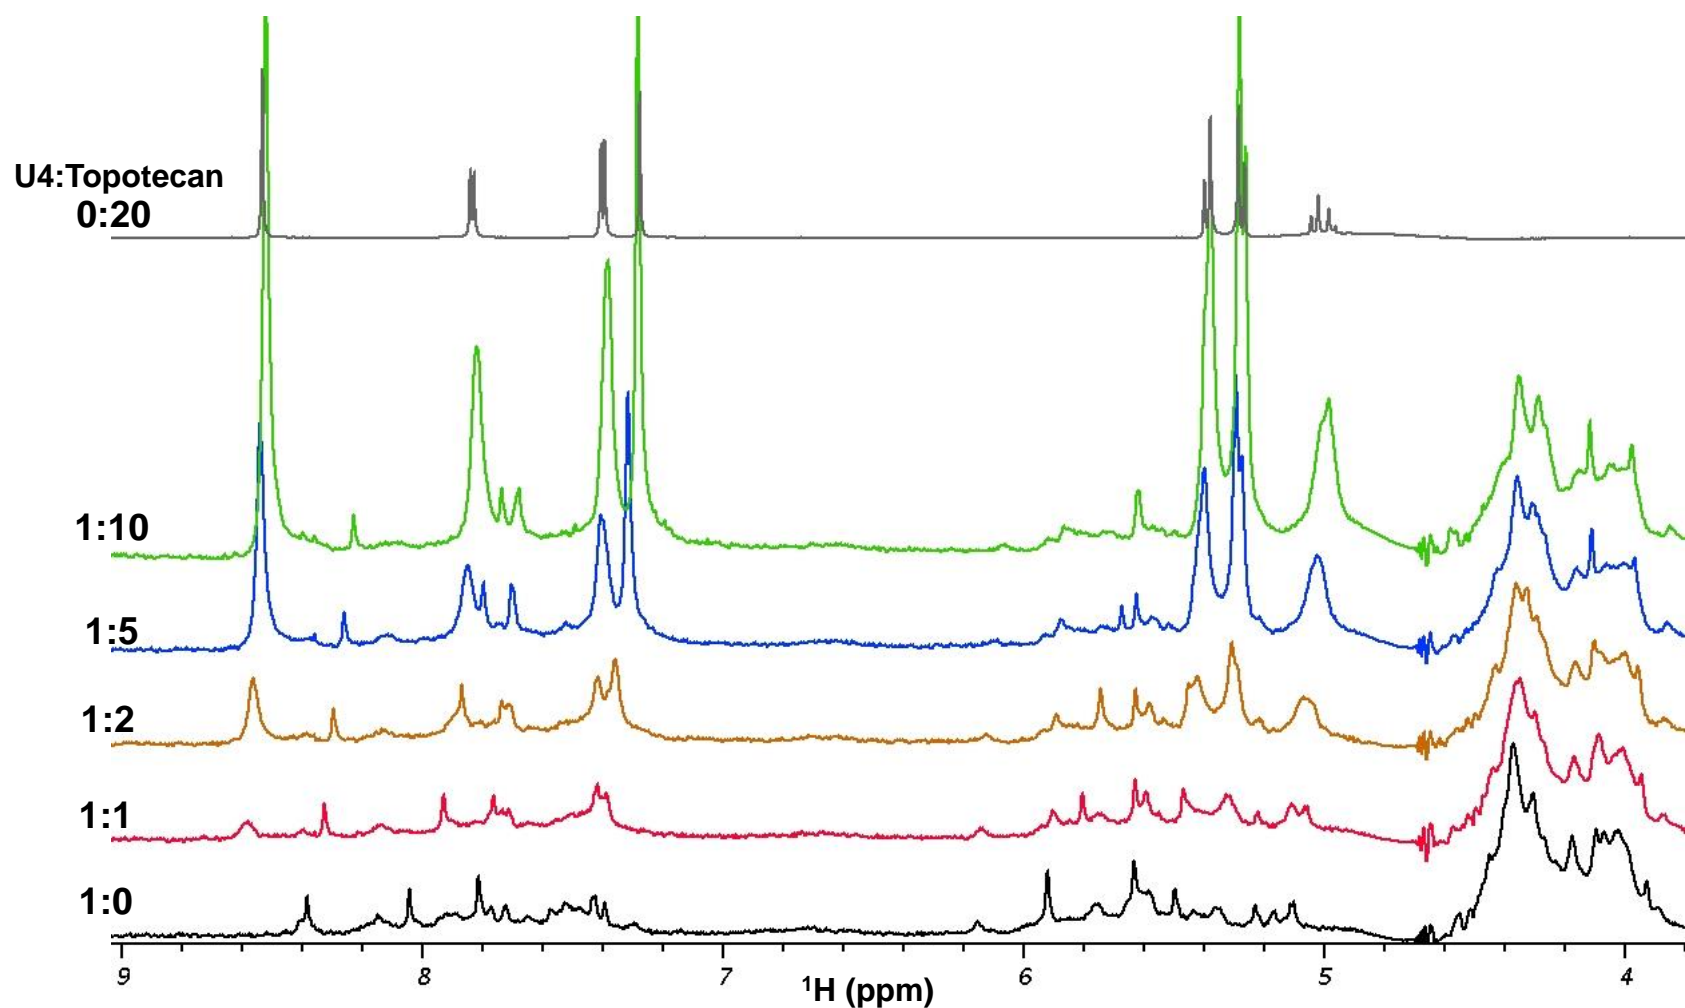

**Figure S4.** Topotecan binds to U4. 1D  $^1\text{H}$  NMR spectra of free U4 5' SL ( $100\mu\text{M}$ ) or after addition of increasing concentrations of topotecan (1:0; 1:1; 1:2; 1:5; 1:10 molar ratios) indicate small molecule binding as shown by the chemical shift. The spectrum of free topotecan is shown on top.

A

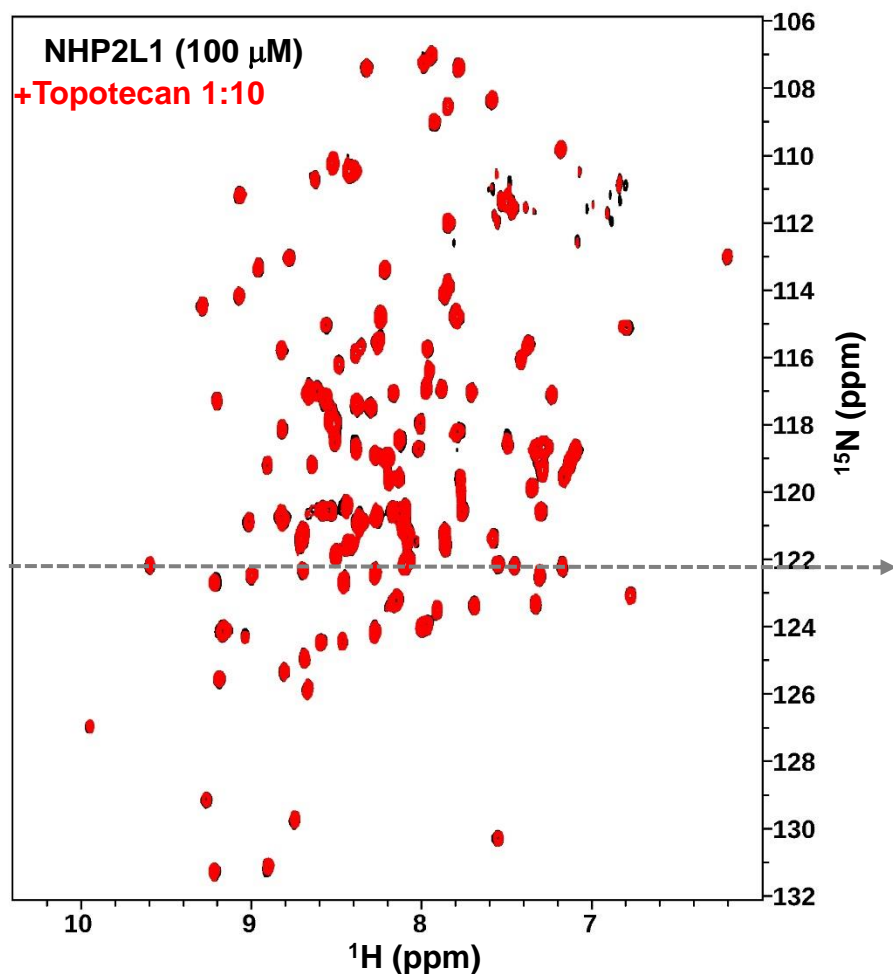

B

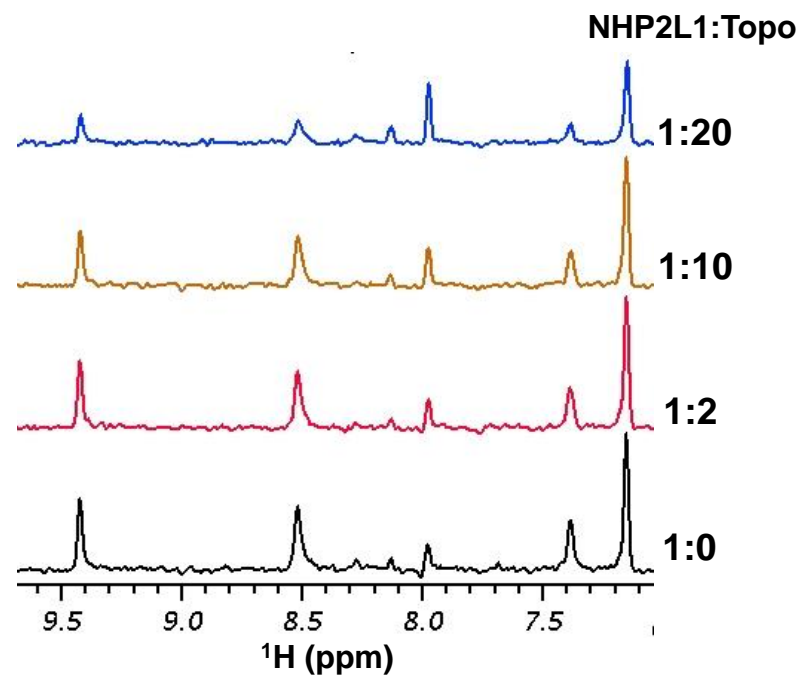

**Figure S5.** Topotecan does not bind to free NHP2L1. (A) Overlay of 2D  $^1\text{H}$ - $^{15}\text{N}$  TROSY spectra of 100 $\mu\text{M}$   $^{15}\text{N}$ -labelled NHP2L1 in the absence (black) and presence (red) of 1mM Topotecan. (B) 1D slices are cross-section of "A" taken at the grey dashed line with free NHP2L1 or after addition of increasing concentrations of topotecan (1:0; 1:2; 1:10;1:20 molar ratios) indicate no binding of the small molecule to NHP2L1.

A

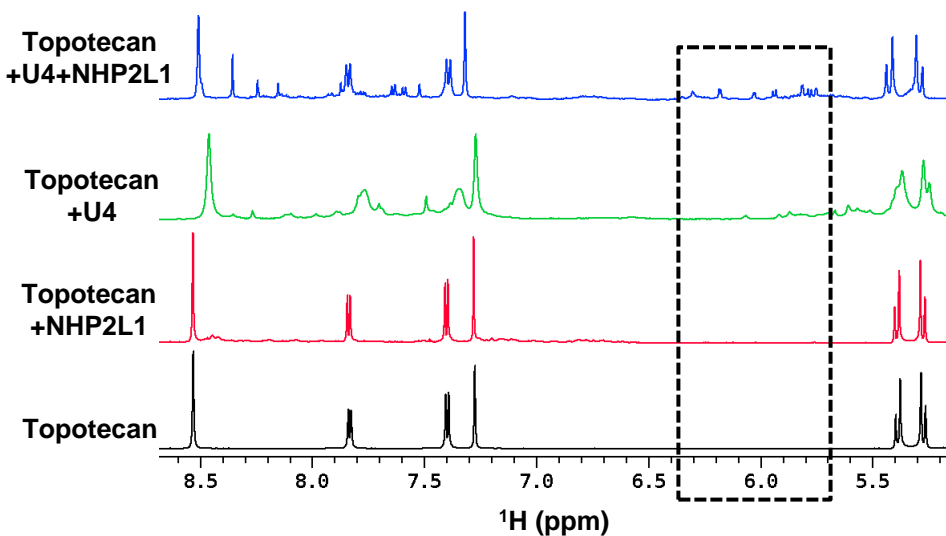

B

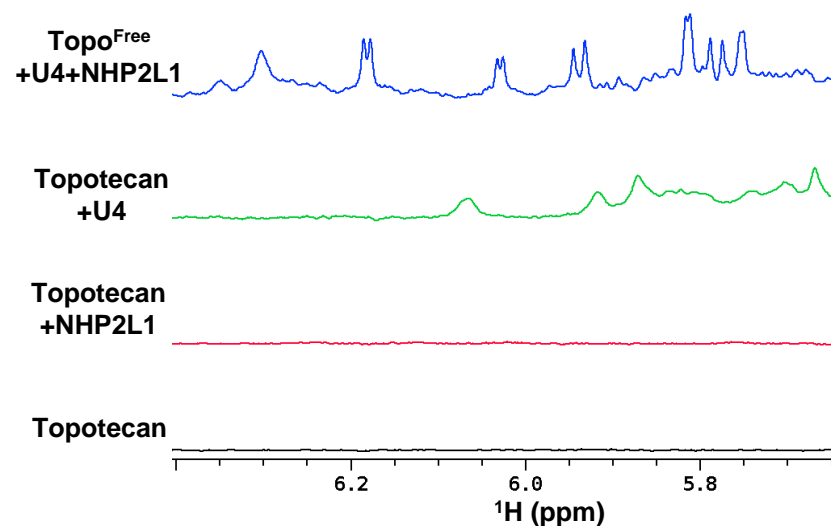

**Figure S6.** Topotecan binds to U4-NHP2L1 complex. (A) The 1D spectra of topotecan alone or with U4, or with NHP2L1, or with U4 and NHP2L1 showed additional resonances (in dashed box) only in the spectrum of topotecan with U4 and NHP2L1 complex. These small populations of topotecan resonances (blue) at 1:1:20 (NHP2L1:U4:topotecan), could possibly represent topotecan bound to U4 in complex with NHP2L1. These conformers are not represent when topotecan interacts with free U4 (Green). (B) represents expanded region inside the dashed box.
